# Supplementary material
Source: MDPI journal article supplement (https://www.mdpi.com/2072-4292/7/3/2401)
Supplement: s1 [file s1]

*Remote Sens.***2015**, *7*, 1-x manuscripts; doi:10.3390/rs70x000x

**OPEN ACCESS**

remote sensing

**ISSN 2072-4292**

www.mdpi.com/journal/remotesensing

Supplementary Information

Development of Decadal (1985-1995-2005) Land-Use and Land Cover Database for India

Parth S. Roy 1,†,*, Arijit Roy 2,†, Pawan K. Joshi 3,†, Manish P. Kale 4,†, Vijay K. Srivastava 5,†, Sushil K. Srivastava 2,†, Ravi S. Dwevidi 5,†, Chitiz Joshi 2,†, Mukunda D. Behera 6,†,
Prasanth Meiyappan 7, Yeshu Sharma 1, Atul K. Jain 7,*, Jamuna S. Singh 8,
Yajnaseni Palchowdhuri 9, Reshma. M. Ramachandran 1, Bhavani Pinjarla 1,
V. Chakravarthi 1, Nani Babu 10, Mahalakshmi S. Gowsalya 11, Praveen Thiruvengadam 11,
Mrinalni Kotteeswaran 11, Vishnu Priya 12, Krishna Murthy V. N. Yelishetty 2,
Sandeep Maithani 2, Gautam Talukdar 13, Indranil Mondal 13, Krishnan S. Rajan 14,
Prasad S. Narendra 15, Sushmita Biswal 3, Anusheema Chakraborty 3, Hitendra Padalia 2,
Manoj Chavan 4, Satish N. Pardeshi 4, Swapnil A. Chaudhari 4, Arur Anand 16, Anjana Vyas 9, Mruthyunjaya K. Reddy 17, M. Ramalingam 18, R. Manonmani 18, Pritiranjan Behera 6,
Pulakesh Das 6, Poonam Tripathi 6, Shafique Matin 6, Mohammed L. Khan 19, Om P. Tripathi 20, Jyotihman Deka 20, Prasanna Kumar 21 and Deepak Kushwaha 1

1 University Center for Earth and Space Science, University of Hyderabad, Prof. C R Rao Road,
P.O. Central University, Hyderabad 500046 AP, India;
E-Mails: yeshu.sharma786@gmail.com (Y.S.); reshmamr04@gmail.com (R.M.R.); pbhavani24@gmail.com (B.P.); vcvarthi@rediffmail.com (V.C.); dip8kush@gmail.com (D.K.)

2 Indian Institute of Remote Sensing, ISRO, 4 Kalidas Road, Dehradun 248001, India;
E-Mails: arijitroy13@gmail.com (A.R.); sksrivastav@iirs.gov.in (S.K.S.);
chitizjoshi@gmail.com (C.J.); yvnkrishna@rediffmail.com (K.M.V.N.Y.);
maithani@iirs.gov.in (S.M.); hitendra@iirs.gov.in (H.P.)

3 Department of Natural Resources, TERI University, Plot No. 10 Institutional Area, Vasant Kunj, New Delhi 110070, India; E-Mails: pkjoshi27@hotmail.com (P.K.J.); sushmita.biswal5@gmail.com (S.B.); anusheema@gmail.com (A.C.)

4 CDAC 3rd Floor, RMZ Westend Center 3, Westend IT Park, Nagras Road, Aundh, Pune 411007 Maharashtra, India; E-Mails: manishpkale@hotmail.com (M.P.K.); cmanoj@cdac.in (M.C.); satishparadeshi@gmail.com (S.N.P.); Swapnil.Chaudhari@icimod.org (S.A.C.)

5 National Remote Sensing Center, Balanagar, Hyderabad 500037, India;
E-Mails: vijayks52@gmail.com (V.K.S.); rsdwivedi51@gmail.com (R.S.D.)

6 Indian Institute of Technology, Kharagpur, 721302, West Bengal, India;
E-Mails: mukundbehera@gmail.com (M.D.B.); prbbehera@gmail.com (P.B.); das.pulok2011@gmail.com (P.D.); tripathy.poonam@gmail.com (P.T.);
shafiquematin@gmail.com (S.M.)

7 Departments of Atmospheric Sciences, University of Illinois, Urbana-Champaign, 105 S South Gregory Street, Urbana, IL 61801, USA; E-Mail: meiyapp2@illinois.edu

8 Department of Botany, BHU, Varanasi, 221005, India; E-Mail: singh.js1@gmail.com

9 CEPT University, Kasturbhai Lalbhai Campus, University Rd, Navrangpura, Ahmadabad, Gujarat 380009, India; E-Mails: yajnaseni.palchoudhuri@gmail.com (Y.P.); anjanavyas@cept.ac.in (A.V.)

10 SACI WATERS, B-87, 3rd Avenue, Sainikpuri, Secunderabad-500-094, Telangana, India;
E-Mail: space.geonani@gmail.com

11 Anna University, Tirunelveli 627005, Tamil Nadu, India;
E-Mails: mahalakshmigowsalya@gmail.com (M.S.G.); thiruvengadam7892@gmail.com (P.T.); mrinalni15@gmail.com (M.K.)

12 Anna University, Kotturpuram, Chennai, Tamil Nadu 600025, India;
E-Mail: [uneuneune15@gmail.com](mailto:uneuneune15@gmail.com)

13 Wildlife Institute of India, Chandrabani, Dehra Dun, 248171, India;
E-Mails: gautamtalukdar@gmail.com (G.T.); indro.gis@gmail.com (I.M.)

14 IIIT, Gachibouwli, Hyderabad, 500032, India; E-Mail: rajan@iiit.ac.in

15 SACON, Coimbatore, 641108, India; E-Mail: snarendraprasad@gmail.com

16 RRSC-C, NRSC (ISRO), Amravati Road, Nagpur-440033, India; E-Mail: anand_isro@rediffmail.com

17 APSRAC, Chinthal Basthi, Hyderabad, 500038, India; E-Mail: kmruthyu@yahoo.com

18 IRS Anna University, Chennai, 600025 India; E-Mails: ramalingam.m1@gmail.com (M.R.); manonmani.mansa@gmail.com (R.M.)

19 Dr. Harisingh Gour Central University, Sagar 470003, MP, India; E-Mail: khanml@yahoo.com

20 NERIST, National Highway 52A, Nirjuli, Arunachal Pradesh 791109, India;
E-Mails: tripathiom7@gmail.com (O.P.T.); jyotishmandeka@gmail.com (J.D.)

21 ORSAC, Plot No. 45/48, Jayadev Vihar, Bhubaneshwar, 751023 India;
E-Mail: pkumarorsac@gmail.com

**†**These authors contributed equally to this work.

***** Authors to whom correspondence should be addressed; E-Mails: psroy13@gmail.com (P.S.R.); jain1@illinois.edu (A.K.J.); Tel.: +91-8008504546 (P.S.R.); +1-217-333-2128 (A.K.J.).

Academic Editors: Chandra Giri and Prasad S. Thenkabail

Received: 27 August 2014 / Accepted: 6 February 2015 / Published:

**Table S1.**Classification Scheme of the LULC maps and other available Global
Land Maps.

| **LULC-India Classes** | **GlobCover-2005 Classes** | | **MODIS-IGBP Classes** |
| --- | --- | --- | --- |
| Aquaculture |  | |  |
| Barren Land | Bare areas | | Barren |
| Built-up and Urban | Artificial areas | | Urban and Built-up |
| Cropland | Irrigated croplands | Cropland | |
| Fallow land | Rain fed croplands |  | |
| Plantations | Mosaic Croplands/Vegetation |  | |
|  | Mosaic Vegetation/Croplands | Cropland/Natural Vegetation Mosaics | |
| Deciduous Broadleaf forests | Closed to open broadleaved evergreen or semi-deciduous Forest | Deciduous Broadleaf Forests | |
|  | Closed broadleaved deciduous forest |  | |
|  | Open broadleaved deciduous forest |  | |
| Deciduous Needle leaf forests |  | Deciduous Needleleaf Forests | |
|  | Open needle leaved deciduous or evergreen forest |  | |
| Evergreen Broadleaf forests |  | Evergreen Needleleaf Forests | |
| Evergreen Needleleaf forests | Closed needleleaf evergreen forest | Evergreen Broadleaf Forests | |
| Mixed Forests | Closed to open mixed broadleaved and needle leaved forest | Mixed Forests | |
| Mangrove forests | Closed broadleaved forest permanently flooded (saline brackish water |  | |
|  | Closed to open broadleaved forest regularly flooded (fresh-brackish water |  | |
| Grassland | Closed to open grassland | Grasslands | |
|  | Mosaic Forest-Shrubland/Grassland | Woody Savannas | |
|  | Mosaic Grassland/Forest-Shrubland | Savannas | |
| Shrublands | Closed to open shrubland | Closed shrublands | |
|  |  | Open shrublands | |
| Permanent Wetlands | Closed to open vegetation regularly flooded | Permanent Wetlands | |
| Snow and Ice | Permanent snow and ice | Snow and Ice | |
| Salt Pans |  |  | |
| Water bodies | Water bodies | Water bodies | |
| Wasteland | Sparse vegetation |  | |

**Table S2.**Satellite images used for land use and land cover mapping for the years
1984–1985, 1994–1995 & 2004–2005;Details on satellite-sensors, path/row, dates and resolution are shown.(The satellite data products were procured from National Remote Sensing Center, India for Resourcesat-LISS III, IRS IB- LISS II. Landsat-MSS/TM/ETM+ sensor data sets were downloaded/obtained from USGS website during the project period.)

**Part 1: Sensor: MSS Data for 1985**

| **Sensor*** | **Path** | **Row** | **Season** | | |
| --- | --- | --- | --- | --- | --- |
| **Jan–March** | **April–June** | **Sep–Dec** |
| MSS | 134 | 40,41,42 | - | 18-04-1985 | 25-09-1985 |
| MSS | 135 | 40,41,42,43,44,45 | - | 25-04-1985 | 16-09-1985 |
| MSS | 136 | 41,42,43,44 | - | 16-04-1985 | 23-09-1985 |
| MSS | 137 | 41,42 | - | 23-04-1985 | 30-09-1985 |
| MSS | 138 | 41,42,43 | - | 30-04-1985 | 28-09-1985 |
| MSS | 139 | 41,42,43,44,45,46 | - | 21-04-1985 | 20-09-1985 |
| MSS | 140 | 41,42,43,44,45,46,47 | - | 28-04-1985 | 19-09-1985 |
| MSS | 141 | 41,42,43,44,45,46,47,48,49 | - | 19-04-1985 | 26-09-1985 |
| MSS | 142 | 41,42,43,44,45,46,47,48,49,50,51,52,53 | - | 26-04-1985 | 17-09-1985 |
| MSS | 143 | 41,42,43,44,45,46,47,48,49,50,51,52,53,54 | - | 17-04-1985 | 24-09-1985 |
|  |  | 40,41 | - | 24-04-1985 | 15-09-1985 |
| MSS | 144 | 42,43,44,45,46,47,48 | 02-03-1986 | 24-04-1985 | 15-09-1985 |
|  |  | 49,50,51,52,53,54 | - | 24-04-1985 | 15-09-1985 |
| MSS | 145 | 39,40, 41,42,43,44,45,46,47,48,49,50,51,52 | - | 15-04-1985 | 22-09-1985 |
|  |  | 36,37,38,39,40 | - | 22-04-1985 | 28-09-1985 |
| MSS | 146 | 41,42,43,44,45,46,47 | 11-01-1986 | 22-04-1985 | 28-09-1985 |
|  |  | 48,49,50,51 | - | 22-04-1985 | 28-09-1985 |
| MSS | 147 | 36,37,38,39,40, 41,42,43,44,45,46,47,48,49 | - | 29-04-1985 | 20-09-1985 |
| MSS | 148 | 35, 36,37,38,39,40, 41,42,43,44,45,46,47 | - | 20-04-1985 | 27-09-1985 |
|  |  | 48 | 14-03-1986 | 20-04-1985 | 27-09-1985 |
|  |  | 49 | - | 20-04-1985 | 27-09-1985 |
|  |  | 40 | - | 27-04-1985 | 18-09-1985 |
| MSS | 149 | 41 | 17-02-1986 | 27-04-1985 | 18-09-1985 |
|  |  | 42,43,44,45 | - | 27-04-1985 | 18-09-1985 |
| MSS | 150 | 41,42,43,44,45 | - | 18-04-1985 | 25-09-1985 |
| MSS | 151 | 41,42,43,44 | - | 25-04-1985 | 16-09-1985 |

Note: *****Resolution-56m.

**Part 2: Sensor: TM Data for 1995**

| **Sensor*** | **Path** | **Row** | **Season** | | |
| --- | --- | --- | --- | --- | --- |
| **Jan–March** | **April–June** | **Sep–Dec** |
|  |  | 40 | 07-03-1996 | - | 16-11-1995 |
| TM | 134 | 41 | 03-01-1996 | - | 15-10-1995 |
|  |  | 42 | 07-03-1996 | 11-06-1996 | 15-10-1995 |
|  |  | 40,41 | - | 15-04-1996 | 09-11-1996 |

**Table S2.***Cont.*

| **Sensor*** | **Path** | **Row** | **Season** | | |
| --- | --- | --- | --- | --- | --- |
| **Jan–March** | **April–June** | **Sep–Dec** |
| TM | 135 | 42 | - | 15-04-1996 | - |
|  |  | 43,44 | 27-02-1996 | - | - |
|  |  | 45 | - | - | - |
|  |  | 41 | - | - | - |
| TM | 136 | 42 | - | 30-04-1993 | - |
|  |  | 43,44 | 09-02-1993 | - | 26-12-1993 |
| TM | 137 | 41 | - | 07-2005-1993 | 30-10-1993 |
|  |  | 42 | - | - | 30-10-1993 |
| TM | 138 | 41 | - | - | - |
|  |  | 42,43 | 22-01-1993 | - | 08-12-1993 |
|  |  | 41 | - | - | 05-11-1996 |
|  |  | 42 | 02-03-1993 | - | 05-11-1996 |
| TM | 139 | 43 | 13-01-1993 | 05-05-1993 | 05-11-1996 |
|  |  | 44 | 13-01-1993 | 21-05-1993 | 05-11-1996 |
|  |  | 45 | 13-01-1993 | 05-05-1993 | 05-11-1996 |
|  |  | 46 | - | 05-05-1993 | 15-12-1993 |
|  |  | 41 | - | - | 04-11-1993 |
|  |  | 42 | - | 31-05-1994 | 04-11-1993 |
|  |  | 43 | 20-01-1993 | 26-04-1993 | 03-10-1993 |
| TM | 140 | 44 | 20-01-1993 | 31-05-1994 | 04-11-1993 |
|  |  | 45 | 04-01-1993 | 31-05-1994 | 04-11-1993 |
|  |  | 46 | 04-01-1993 | 31-05-1994 | - |
|  |  | 47 | 04-01-1993 | 26-04-1993 | - |
|  |  | 41 | 29-12-1993 | 16-03-1993 | - |
| TM | 141 | 42 | 04-02-1993 | 03-05-1993 | 11-11-1993 |
|  |  | 43,44 | 16-03-1993 | 03-05-1993 | 11-11-1993 |
|  |  | 45,46,47,48,49 | 16-03-1993 | 03-05-1993 | - |
|  |  | 41 | - | 26-05-1993 | 20-12-1993 |
|  |  | 42,43,44,45 | 18-01-1993 | 26-05-1993 | 20-12-1993 |
|  |  | 46,47 | 18-01-1993 | 11-04-1994 | 18-11-1993 |
| TM | 142 | 48 | 01-02-1993 | 11-06-1993 | 18-11-1993 |
|  |  | 49 | - | 11-06-1993 | - |
|  |  | 50 | - | 26-05-1993 | - |
|  |  | 51 | - | 11-06-1993 | - |
|  |  | 52,53 | - | - | - |
|  |  | 41,42 | - | 25-03-1997 | 11-12-1993 |
|  |  | 43 | 26-02-1993 | 25-03-1997 | 11-12-1993 |
|  |  | 44 | 26-02-1993 | 14-03-1993 | 11-12-1993 |
|  |  | 45,46,47 | 26-02-1993 | 01-05-1993 | 11-12-1993 |

**Table S2.***Cont.*

| **Sensor*** | **Path** | **Row** | **Season** | | |
| --- | --- | --- | --- | --- | --- |
| **Jan–March** | **April–June** | **Sep–Dec** |
| TM | 143 | 48,49 | 26-02-1993 | 01-05-1993 | 27-12-1993 |
|  |  | 50 | 26-02-1993 | 01-05-1993 | - |
|  |  | 51 | 14-03-1993 | 01-05-1993 | 27-12-1993 |
|  |  | 52 | 14-03-1993 | 01-05-1993 | - |
|  |  | 53 | 14-03-1993 | - | - |
|  |  | 54 | - | - | - |
|  |  | 40 | 11-01-1997 | 05-03-1993 | 31-10-1993 |
|  |  | 41 | 11-01-1997 | - | 31-10-1993 |
|  |  | 42 | 28-02-1997 | - | 31-10-1993 |
|  |  | 43 | 28-02-1997 | - | 16-11-1993 |
|  |  | 44,45,46 | 28-02-1997 | 24-05-1993 | 16-11-1993 |
|  |  | 47 | 05-03-1993 | - | 16-11-1993 |
| TM | 144 | 48 | 05-03-1993 | 24-05-1993 | 16-11-1993 |
|  |  | 49,50 | - | 05-03-1993 | 16-11-1993 |
|  |  | 51 | 16-01-1993 | - | 16-11-1993 |
|  |  | 52 | 16-01-1993 | - | - |
|  |  | 53 | - | 05-03-1993 | - |
|  |  | 54 | - | - | - |
|  |  | 39,40,41,42,43,44,45 | 02-01-1997 | - | - |
| TM | 145 | 46 | 02-01-1997 | - | 18-11-1997 |
|  |  | 47,48,49,50,51,52 | 02-01-1997 | - | - |
|  |  | 36 | - | - | - |
|  |  | 37,38 | - | 22-05-1993 | - |
| TM | 146 | 39 | 19-03-1993 | 22-05-1993 | 29-10-1993 |
|  |  | 40,41,42,43,44,45,46 | 30-01-1993 | 22-05-1993 | 30-11-1993 |
|  |  | 47,48,49,50,51 | 30-01-1993 | 04-04-1993 | 16-12-1993 |
|  |  | 36 | - | 27-04-1993 | - |
|  |  | 37,38 | - | 01-06-1994 | - |
|  |  | 39 | 22-02-1993 | 01-06-1994 | - |
|  |  | 40 | 22-02-1993 | 27-04-1993 | - |
| TM | 147 | 41 | 22-02-1993 | 01-06-1994 | 23-12-1993 |
|  |  | 42,43,44,45 | 05-01-1993 | 01-06-1994 | 23-12-1993 |
|  |  | 46,47 | 05-01-1993 | 29-05-1993 | 23-12-1993 |
|  |  | 48 | 22-02-1993 | 29-05-1993 | 23-12-1993 |
|  |  | 49 | 22-02-1993 | 01-06-1994 | 23-12-1993 |
|  |  | 35,36,37,38 | - | - | 14-12-1993 |
| TM | 148 | 39,40,41,42,43 | 12-01-1993 | - | 14-12-1993 |
|  |  | 44,45,46,47,48,49 | 23-01-1997 | - | 14-12-1993 |
|  |  | 40 | - | 11-05-1993 | 05-12-1993 |
| TM | 149 | 41 | 19-01-1993 | 11-05-1993 | 05-12-1993 |
|  |  | 42,43 | - | 11-05-1993 | 19-11-1993 |
|  |  | 44,45 | 19-01-1993 | 11-05-1993 | 19-11-1993 |

**Table S2.***Cont.*

| **Sensor*** | **Path** | **Row** | **Season** | | |
| --- | --- | --- | --- | --- | --- |
| **Jan–March** | **April–June** | **Sep–Dec** |
| TM | 150 | 41 | 26-01-1993 | - | 12-12-1993 |
|  |  | 42,43,44,45 | 14-02-1994 | 03-06-1993 | 12-12-1993 |
| TM | 151 | 41,42,43,44 | 28-03-1995 | 09-05-1993 | - |

Note: *Resolution-30m.

**Part 3: Sensor: LISS-II Data for 1995**

| **Sensor** | **Path** | **Row** | **Season** | | |
| --- | --- | --- | --- | --- | --- |
| **Jan–March** | **April–June** | **Sep–Dec** |
| LISS-1 | 12 | 48 | 10-3-1993 | - | 16-11-1994 |
| LISS-1 | 13 | 47,49,50 | 7-3-95 | - | 9-12-1994 |
| LISS-1 | 14 | 50,51,52,53,54 | 5-2-1994 | - | 9-11-1993 |
| LISS-1 | 15 | 51,52,53 | 28-2-1995 | - | 28-10-1994 |
| LISS-1 | 16 | 48,49,50,51,52,53 | 7-2-1994 | - | 20-11-1994 |
| LISS-1 | 17 | 48,49,50,51,52,53 | - | 2-4-95 | 8-11-1995 |
| LISS-1 | 18 | 48,49,50,51,52,53 | 16-3-1993 | - | 22-11-1994 |
| LISS-1 | 19 | 48,49,50,51,52,53,54 | - | 26-4-1995 | 14-11-1993 |
| LISS-1 | 20 | 49,50,51,52,53,54 | 5-3-1994 | - | 3-12-1995 |
| LISS-1 | 21 | 48,49,50,51,52,53,54 | 6-3-1994 | - | 12-10-1994 |
| LISS-1 | 22 | 48,49,50,51,52,53,54,55,56,57 | 29-3-1994 | - | 13-10-1994 |
| LISS-1 | 23 | 48,49,50,51,52,53,54,55,56,57,58,59,60,61 | 8-3-1994 | - | 13-10-1994 |
| LISS-1 | 24 | 48,49,50,51,52,53,54,55,56,57,58,59,60,61,62,63 | - | 23-5-1995 | 27-11-1994 |
| LISS-1 | 25 | 46,47,48,49, 50,51,52,53,54,55,56,57,58,59,60,61,62,63 | - | 24-5-1995 | 24-10-1995 |
| LISS-1 | 26 | 46,47,48,49,50,51,52,53,54,55,56,57,58,59 | - | 11-4-1995 | 9-12-1995 |
| LISS-1 | 27 | 46,47,48,49,50,51,52,53,54,55,56,57,58,59,60 | - | 12-4-1995 | 9-11-1994 |
| LISS-1 | 28 | 42,43,44,45,46,47,48,49,50,51,52,53,54,55,56,57,58,59,60 | 19-2-1994 | - | 10-11-94 |
| LISS-1 | 29 | 42,43,44,45,46,47,48,49,50,51,52,53,54,55,56 | 20-2-1994 | - | 20-11-1995 |
| LISS-1 | 30 | 42,43,44,45,46,47,48,49,50,51,52,53,54,56,56,57 | 15-4-1995 | - | 25-11-1993 |
| LISS-1 | 31 | 42,43,44,45,46,47,48,49,50,51,52,53,54 | 22-2-1994 | - | 22-10-1994 |
| LISS-1 | 32 | 41,42,43,44,45,46,47,48,49,50,51,52,53,54 | 23-2-1994 | - | 23-10-1994 |
| LISS-1 | 33 | 41,42,43,44,45,46,47,48,49,50,51,52,53 | 24-2-1994 | - | 15-11-1994 |
| LISS-1 | 34 | 41,42,43,44,45,46,47,48,49,50,51,52,53,54,55,56 | 16-2-1993 | - | 16-11-1994 |

Note: *Resolution-72m.

**Table S2.***Cont.*

**Part 4: Sensor: ETM+ and TM data for 2005**

| **Sensor*** | **Path** | **Row** | **Season** | | |
| --- | --- | --- | --- | --- | --- |
| **Jan–March** | **April–June** | **Sep–Dec** |
|  |  | 40 | 03-01-2005 | 08-05-2004 | 03-11-2005 |
| ETM+ | 134 | 41 | 03-01-2005 | 28-04-2006 | 11-11-2005 |
|  |  | 42 | 04-02-2005 | 28-04-2006 | 05-12-2005 |
|  |  | 40 | 11-02-2005 | 07-05-2004(TM) | 10-11-2005 |
|  |  | 41 | 11-02-2005 | 02-05-2005 | 10-11-2005 |
| ETM+ | 135 | 42 | 11-02-2005 | 02-05-2005 | 12-12-2005 |
|  |  | 43,44 | 11-02-2005 | 16-04-2005 | 26-11-2005 |
|  |  | 45 | 26-01-2005 | 16-04-2005 | 26-11-2005 |
|  |  | 41 | 01-01-2005 | 23-04-2005 | 30-11-2004 |
|  |  | 42 | 01-01-2005 | 02-06-2005(TM) | 01-11-2005 |
| ETM+ | 136 | 43 | 01-01-2005 | 10-06-2005 | 17-11-2005 |
|  |  | 44 | 01-01-2005 | 15-04-2005(TM) | 16-10-2005 |
| ETM+ | 137 | 41 | 08-01-2005 | 01-04-2006 | 08-11-2005 |
|  |  | 42 | 13-03-2005 | 14-04-2005 | 10-12-2005 |
|  |  | 41 | 07-01-2005 | 05-04-2005 | 07-11-2005 |
| ETM+ | 138 | 42 | 07-01-2005 | 05-04-2005 | 15-11-2005 |
|  |  | 43 | 07-01-2005 | 21-04-2005 | 15-11-2005 |
|  |  | 41 | 06-01-2005 | 12-04-2005 | 08-12-2005 |
|  |  | 42 | 06-01-2005 | 12-04-2005 | 06-11-2005 |
|  |  | 43 | 06-01-2005 | 30-05-2005 | 06-11-2005 |
| ETM+ | 139 | 44 | 06-01-2005 | 14-05-2005 | 06-11-2005 |
|  |  | 45 | 06-01-2005 | 14-05-2005 | 24-12-2005 |
|  |  | 46 | 06-01-2005 | 14-05-2005 | 06-11-2005 |
|  |  | 41 | 05-01-2005(TM) | 03-04-2005 | 31-12-2005 |
|  |  | 42 | 02-03-2005 | 21-05-2005 | 15-12-2005 |
|  |  | 43 | 14-02-2005 | 05-05-2005 | 13-11-2005 |
| ETM+ | 140 | 44 | 13-01-2005 | 13-01-2005 | 13-11-2005 |
|  |  | 45 | 13-01-2005 | 21-05-2005 | 13-11-2005 |
|  |  | 46 | 13-01-2005 | 05-05-2005 | 13-11-2005 |
|  |  | 47 | 14-02-2005 | 05-05-2005 | 13-11-2005 |
|  |  | 41 | 13-02-2005 | 28-05-2005 | 06-12-2005 |
|  |  | 42,43 | 04-01-2005 | 12-05-2005 | 20-11-2005 |
|  |  | 44 | 04-01-2005 | 12-05-2005 | 12-11-2005(TM) |
| ETM+ | 141 | 45 | 20-01-2005 | 12-05-2005 | 12-11-2005 |
|  |  | 46 | 20-01-2005 | 12-05-2005 | 12-11-2005(TM) |
|  |  | 47 | 21-02-2005 | 12-05-2005 | 12-11-2005(TM) |
|  |  | 48,49 | 13-02-2005 | 12-05-2005 | 12-11-2005(TM) |
|  |  | 41 | 12-02-2005 | 04-06-2005 | 13-12-2005 |
|  |  | 42 | 27-01-2005 | 19-05-2005 | 11-11-2005 |
|  |  | 43 | 11-01-2005 | 19-05-2005 | 11-11-2005 |
|  |  | 44 | 11-01-2005 | 04-06-2005 | 11-11-2005 |

**Table S2.***Cont.*

| **Sensor*** | **Path** | **Row** | **Season** | | |
| --- | --- | --- | --- | --- | --- |
| **Jan–March** | **April–June** | **Sep–Dec** |
|  |  | 45 | 11-01-2005 | 01-04-2005 | 11-11-2005 |
|  |  | 46 | 12-02-2005 | 19-05-2005 | 11-11-2005 |
| ETM+ | 142 | 47 | 12-02-2005 | 19-05-2005 | 11-11-2005 |
|  |  | 48 | 12-02-2005 | 20-06-2005 | 11-11-2005 |
|  |  | 49 | 12-02-2005 | 20-06-2005 | 29-12-2005 |
|  |  | 50,51 | 12-02-2005 | 19-05-2005 | 29-12-2005 |
|  |  | 52 | 28-02-2005 | 19-05-2005 | 10-12-2004 |
|  |  | 53 | 28-02-2005 | 17-04-2005 | 10-12-2004 |
|  |  | 41 | 23-03-2005 | 26-05-2005 | 18-11-2005 |
|  |  | 42,43 | 03-02-2005 | 10-05-2005 | 18-11-2005 |
|  |  | 44 | 18-01-2005 | 10-05-2005 | 18-11-2005 |
|  |  | 45 | 18-01-2005 | 11-06-2005 | 18-11-2005 |
|  |  | 46 | 03-02-2005 | 11-06-2005 | 18-11-2005 |
| ETM+ | 143 | 47,48,49 | 19-02-2005 | 10-05-2005 | 18-11-2005 |
|  |  | 50 | 19-02-2005 | 26-05-2005 | 01-12-2004 |
|  |  | 51 | 27-02-2005 | 26-05-2005 | 01-12-2004 |
|  |  | 52 | 26-01-2005 | 26-05-2005 | 17-12-2004 |
|  |  | 53 | 23-03-2005 | 27-04-2006 | 20-12-2005 |
|  |  | 54 | 26-01-2005(TM) | 27-04-2006 | 20-12-2005 |
|  |  | 40 | 26-02-2005 | 02-06-2005 | 11-12-2005 |
|  |  | 41 | 26-02-2005 | 02-06-2005 | 11-12-2005 |
|  |  | 42 | 09-01-2005 | 02-06-2005 | 11-12-2005 |
|  |  | 43,44,45 | 09-01-2005 | 17-05-2005 | 11-12-2005 |
|  |  | 46 | 09-01-2005 | 02-06-2005 | 27-12-2005 |
|  |  | 47 | 09-01-2005 | 17-05-2005 | 27-12-2005 |
| ETM+ | 144 | 48 | 02-02-2005(TM) | 17-05-2005 | 27-12-2005 |
|  |  | 49,50 | 17-01-2005(TM) | 01-05-2005 | 27-12-2005 |
|  |  | 51 | 25-01-2005 | 12-04-2004 | 27-12-2005 |
|  |  | 52 | 10-02-2005 | 12-04-2004 | 30-12-2006 |
|  |  | 53 | 10-02-2005 | 15-04-2005 | 30-12-2006 |
|  |  | 54 | 25-01-2005 | - | 27-12-2005 |
|  |  | 39 | 14-01-2004 | 09-06-2005 | 02-12-2005 |
|  |  | 40 | 15-02-2004 | 24-05-2005 | 02-12-2005 |
|  |  | 41 | 15-02-2004 | 08-05-2005 | 02-12-2005 |
|  |  | 42 | 17-02-2005 | 08-05-2005 | 18-12-2005 |
|  |  | 43 | 05-03-2005 | 08-05-2005 | 18-12-2005 |
|  |  | 44 | 08-01-2005(TM) | 08-05-2005 | 18-12-2005 |
| ETM+ | 145 | 45 | 08-01-2005(TM) | 09-06-2005 | 18-12-2005 |
|  |  | 46,47 | 08-01-2005(TM) | 06-04-2005 | 18-12-2005 |
|  |  | 48 | 09-02-2005(TM) | 06-04-2005 | 18-12-2005 |
|  |  | 49 | 16-01-2005 | 06-04-2005 | 18-12-2005 |
|  |  | 50 | 16-01-2005 | 22-04-2005 | 16-11-2005 |

**Table S2.***Cont.*

| **Sensor*** | **Path** | **Row** | **Season** | | |
| --- | --- | --- | --- | --- | --- |
| **Jan–March** | **April–June** | **Sep–Dec** |
|  |  | 51 | 16-01-2005 | 19-04-2004 | 16-11-2005 |
|  |  | 52 | 05-03-2005 | 22-04-2005 | 16-11-2005 |
|  |  | 36 | 12-03-2005 | 29-04-2005 | 06-12-2004 |
|  |  | 37 | 12-03-2005 | 29-04-2005 | 09-12-2005 |
|  |  | 38 | 07-01-2005 | 13-04-2005 | 09-12-2005 |
| ETM+ | 146 | 39 | 08-02-2005 | 16-06-2005 | 09-12-2005 |
|  |  | 40 | 08-02-2005 | 31-05-2005 | 09-12-2005 |
|  |  | 41 | 07-01-2005 | 31-05-2005 | 09-12-2005 |
|  |  | 42,43,44,45,46,47,48,49 | 07-01-2005 | 15-05-2005 | 09-12-2005 |
|  |  | 50 | 23-01-2005 | 10-04-2004 | 09-12-2005 |
|  |  | 51 | 23-01-2005 | 12-05-2004 | 09-12-2005 |
|  |  | 36 | 22-03-2006 | 20-04-2005 | 29-10-2005 |
|  |  | 37,38 | 13-02-2004 | 20-04-2005 | 16-12-2005 |
|  |  | 39 | 14-01-2005 | 06-05-2005 | 16-12-2005 |
|  |  | 40 | 30-01-2005 | 23-06-2005 | 16-12-2005 |
| ETM+ | 147 | 41 | 14-01-2005 | 20-04-2005 | 16-12-2005 |
|  |  | 42,43 | 14-01-2005 | 06-05-2005 | 16-12-2005 |
|  |  | 44 | 14-01-2005 | 06-05-2005 | 14-11-2005 |
|  |  | 45,46 | 15-02-2005 | 06-05-2005 | 14-11-2005 |
|  |  | 47,48,49 | 14-01-2005 | 04-04-2005 | 14-11-2005 |
|  |  | 35 | 22-02-2005 | 16-05-2006 | 07-12-2005 |
|  |  | 36 | 22-02-2005 | 11-04-2005 | 20-10-2005 |
|  |  | 37,38 | 22-02-2005 | 11-04-2005 | 07-12-2005 |
|  |  | 39 | 22-02-2005 | 14-06-2005 | 07-12-2005 |
| ETM+ | 148 | 40 | 05-01-2005 | 13-05-2005 | 07-12-2005 |
|  |  | 41,42 | 22-02-2005 | 13-05-2005 | 07-12-2005 |
|  |  | 43,44,45,46,47 | 05-01-2005 | 13-05-2005 | 07-12-2005 |
|  |  | 48 | 08-01-2006 | 16-05-2006 | 07-12-2005 |
|  |  | 49 | 08-01-2006 | 30-04-2006 | 07-12-2005 |
|  |  | 40,41,42 | 12-01-2005 | 20-05-2005 | 14-12-2005 |
| ETM+ | 149 | 43 | 12-01-2005 | 04-05-2005 | 12-11-2005 |
|  |  | 44,45,46 | 12-01-2005 | 04-05-2005 | 14-12-2005 |
|  |  | 41 | 03-01-2005 | 11-05-2005 | 05-12-2005 |
|  |  | 42 | 03-01-2005 | 11-05-2005 | 19-11-2005 |
| ETM+ | 150 | 43,44 | 03-01-2005 | 11-05-2005 | 03-11-2005 |
|  |  | 45 | 03-01-2005 | 11-05-2005 | 05-12-2005 |
|  |  | 46 | 22-01-2006 | 12-04-2006 | 05-12-2005 |
| ETM+ | 151 | 41,42 | 26-01-2005 | 18-05-2005 | 12-12-2005 |
|  |  | 43,44 | 10-01-2005 | 18-05-2005 | 12-12-2005 |

Note: *Resolution-30m.

Methdology

1. Georectification of Data

The geo-rectified images of Landsat TM 2005 of the entire country obtained from USGS were used as master images after ortho-rectification. Geometric rectification was carried out forall the products used in the study viz., LISS III, LISS II, MSS, TM data using ERDAS/Imagine var. 9.1. First order polynomial equation used with an allowable RMS error was set to default value of less than one pixel. The RMS was found to be 0.4 pixels (*i.e.*, less than 9.2 m) in case of LISS-III data with 15 GCPs in each scene, having a range of 0.35 to 0.60 pixels (*i.e.*, 8 to 15 m). But in case of LISS-1 and MSS data the mean RMS was 0.8 pixels (54 m in case of LISS-1 and about 52 m in case of MSS data). The data for the three time periods were used to generate LULC maps for the three years.

2. Generating LULC Maps

During 2005–2010, several government institutions of India have been participating in National (Natural) Resource Census (NRC) project of Indian Space Research Organisation (ISRO) to create geospatial data of seven thematic map layers (viz., Land use and Land cover, Geomorphology, Land degradation, Wetland, Forest, Soil, Snow and Glaciers) using 2005 satellite data sets for which, the first author was the project director. The LULC mapping (at Level III) was carried out/coordinated by National Remote Sensing Center (ISRO) at 1:50,000 scale. The project manual, training of team members and quality assurance has ensured uniform quality of mapping. The map was the main source to generate 2005 map at 1:250,000 scale by regrouping the classes as per the IGBP classes.

**Table S3.** Hierarchical Land-use and Land-cover classification scheme used for mapping India using satellite remote sensing data at 1:50,000 scale.

| **Land Use code** | **Level I** | **Level II** | **Level III** |
| --- | --- | --- | --- |
| 010000 | Built Up | | |
| 010100 |  | Built Up (Urban) | |
| 010101 |  |  | Residential |
| 010102 |  |  | Mixed Built Up area |
| 010103 |  |  | Recreational |
| 010104 |  |  | Public and semipublic |
| 010105 |  |  | Communications |
| 010106 |  |  | Public Utilities & facility |
| 010107 |  |  | Commercial |
| 010108 |  |  | Reclaimed land |
| 010109 |  |  | Vegetated Area |
| 010110 |  |  | Transportation |
| 010200 |  | Built Up (Rural) | |
| 010201 |  |  | Built Up area (Rural) |
| 010300 |  | Mining / Industrial area | |
| 010301 |  |  | Industrial |
| 010302 |  |  | Mine/Quarry |

**Table S3.***Cont.*

| **Land Use code** | **Level I** | **Level II** | **Level III** |
| --- | --- | --- | --- |
| 010303 |  |  | Industrial/Mine dump |
| 010304 |  |  | Ash/Cooling/Tailing pond |
| 010305 |  |  | Abandoned mine pit |
| 010306 |  |  | Land fill area |
| 020000 | Agricultural Land | | |
| 020100 |  | Crop Land | |
| 020101 |  |  | Kharif Crop |
| 020102 |  |  | Rabi Crop |
| 020103 |  |  | Zaid Crop |
| 020104 |  |  | Two crop area |
| 020105 |  |  | More than two crop |
| 020200 |  | Fallow | |
| 020201 |  |  | Current Fallow |
| 020202 |  |  | Long Fallow |
| 020300 |  | Plantation | |
| 020301 |  |  | Agriculture Plantation |
| 020302 |  |  | Horticulture Plantation |
| 020303 |  |  | Agro Horticulture Plantation |
| 020400 |  | Aquaculture/pisciculture | |
| 030000 | Forest | | |
| 030100 |  | Evergreen Semi Evergreen | |
| 030101 |  |  | Dense/Closed |
| 030102 |  |  | Open |
| 030200 |  | Deciduous (Dry/Moist/Thorn) | |
| 030201 |  |  | Dense/Closed |
| 030202 |  |  | Open |
| 030300 |  | Forest Plantation | |
| 030400 |  | Scrub Forest | |
| 030500 |  | Forest Blank | |
| 030600 |  | Littoral/Swamp Forest (Mangrove/Forest Water Swamp) | |
| 030601 |  |  | Dense |
| 030602 |  |  | Open |
| 030700 |  | Tree Clad Area | |
| 030701 |  |  | Dense |
| 030702 |  |  | Open |
| 040000 | Natural/Semi natural grassland & Grazing land | | |
| 040100 |  | Alpine/Sub-Alpine | |
| 040200 |  | Temperate/Sub tropical | |
| 040300 |  | Tropical/Desertic | |
| 040400 |  | Man made Grass lands | |
| 050000 | Wastelands | | |
| 050100 |  | Salt affected land | |
| 050101 |  |  | Saline |

**Table S3.***Cont.*

| **Land Use code** | **Level I** | **Level II** | **Level III** |
| --- | --- | --- | --- |
| 050102 |  |  | Sodic |
| 050103 |  |  | Saline/Sodic |
| 050200 |  | Gullied/Ravinous land | |
| 050201 |  |  | Gullied |
| 050202 |  |  | Shallow Ravinous |
| 050203 |  |  | Deep Ravinous |
| 050300 |  | Scrub land | |
| 050301 |  |  | Dense scrub |
| 050302 |  |  | Open scrub |
| 050400 |  | Sandy area | |
| 050401 |  |  | Desentic |
| 050402 |  |  | Coastal |
| 050403 |  |  | Riverine |
| 050500 |  | Barren Rocky/Stony waste | |
| 060000 | Wetlands | | |
| 060100 |  | Inland natural | |
| 060200 |  | Inland Manmade | |
| 060300 |  | Coastal Natural | |
| 060400 |  | Coastal Manmade | |
| 070000 | Water bodies | | |
| 070100 |  | River/Stream | |
| 070101 |  |  | Perennial |
| 070102 |  |  | Dry |
| 070200 |  | Canal/Drain | |
| 070201 |  |  | Lined |
| 070202 |  |  | Unlined canal and drain |
| 070300 |  | Lakes/ponds | |
| 070301 |  |  | Perennial |
| 070302 |  |  | Dry |
| 070400 |  | Reservoir/Tanks | |
| 070401 |  |  | Perennial |
| 070402 |  |  | Dry |
| 080000 | Snow covered/Glacial area | | |
| 090000 | Others | | |
| 090100 |  | Shifting cultivation | |
| 090101 |  |  | Current |
| 090102 |  |  | Abandoned |

3. Decadal Mapping of LULC Mapping for 1985–1995–2005

LULC 2005 map was prepared using on screen digitization and extensive ground truth. The data sets pertaining totwo/three seasons were used to ensure accuracyof mapping. The seasonal cropsand fallowcould mapped using seasonal data. For generating the LULC map for 1995, the copy of 2005 map was overlaid onto the 1995 images of LISS-I/Landsat TM mages (ERDAS/Imagine var. 9.1).
The polygons in 2005 map that have undergone change during the period were modified to generate 1995 maps (a). Likewise, 1995 map was overlaid onto the MSS data of 1985 to generate LULC map for 1985. The schematic representation of the methodology is shown in Figure S1.

**Figure S1.** Methodology for LULC maps of 1995 and 1985 to maintain continuity of accuracy as in 2005 (**a**) editing of changes in polygon, (**b**) procedure for change mapping and validation.

The accuracy estimation using field sample points carried out for the LULC maps of 2005 was found to be 95% at 90% confidence level. Further, the change maps were generated and subsequently validated by means of revisits to corresponding field areas. A few examples from peninsular India (Krishna basin) where validation is realized are shown in Figures S2 and S3.

**Figure S2.** Identification of change areas for field verification.


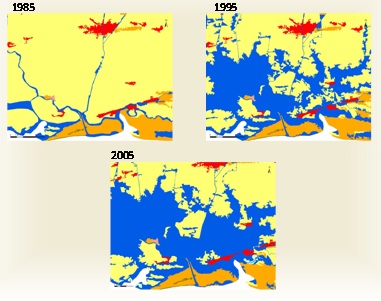


**(a)**

**Figure S3.***Cont.*


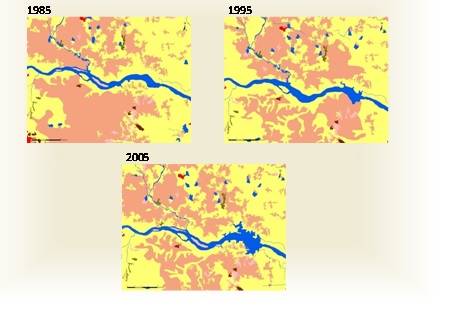


**(b)**

**Figure S3.** Examples of change areas verified by ground truth collection (**a**) Changes observed around Kolleru Lake, Andhra Pradesh; (**b**) Changes in the river course and scrub area in the Pennar baisn.

Supplementary on Results

Figures S4 and S5 show the digitized LULC maps of India using TM/LISS-I data and Landsat MSS satellite multispectral remote sensing data of 1995 and 1985. The cropland is mostly prevalent in the Indo-Gangetic plains, central and peninsular India, Brahmaputra river valley, east coast and the west coast of India. The cropland constitutes 47.55% and 47.45% of the total geographic area (TGA) during 1985 and 1995 respectively (Figures S4 and S5). The LULC maps of 1985 and 1995 show considerable decrease in forest areas particularly in the Himalayas (both eastern and western), north east hills, Western Ghats, parts of Central Highlands and Andaman and Nicobar Islands. The total forest cover during 1985 and 1995 were 23.25% and 22.67% of the TGA respectively. There has been a substantial variation in the area under built-up class during this period which has increased from 34,019 km2 to 40,090 km2 during the period.


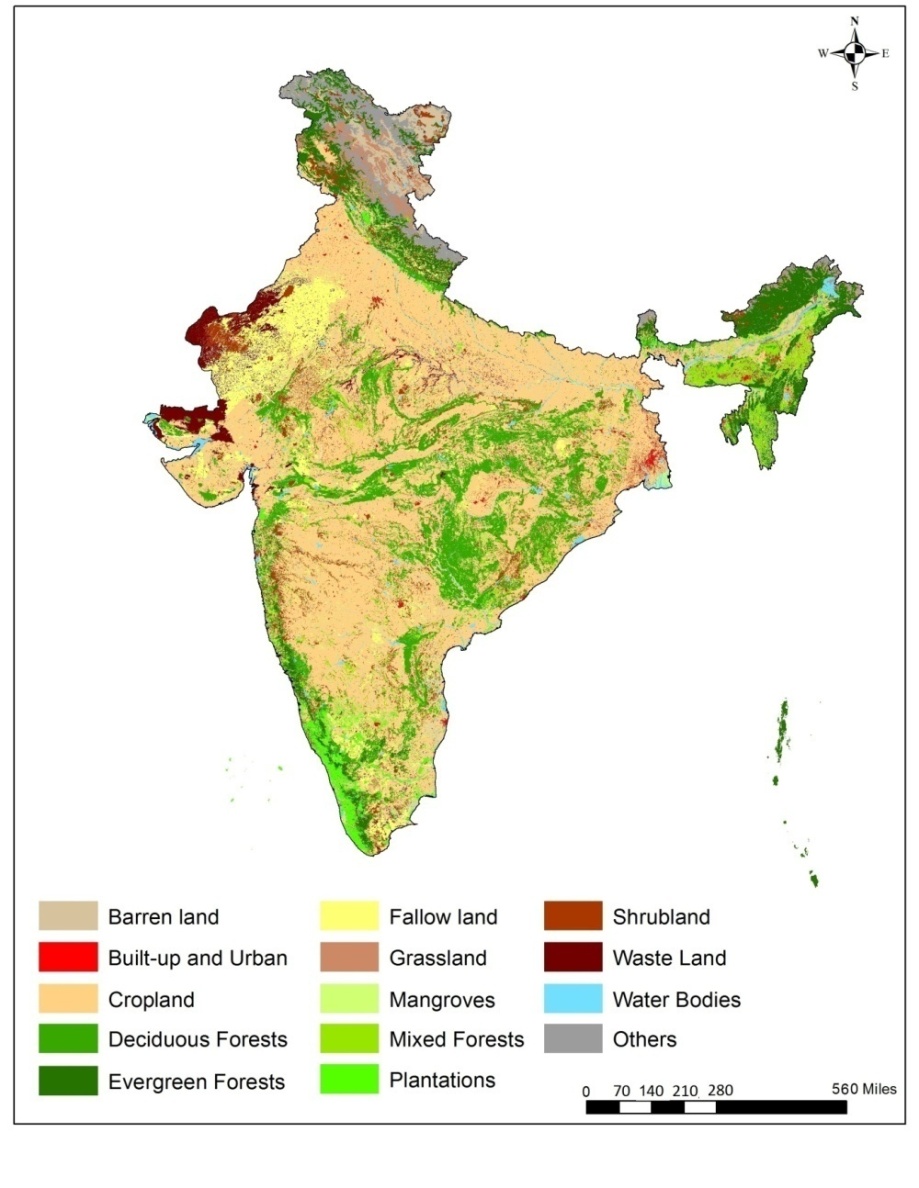


**Figure S4.**Land use and land cover map prepared using satellite remote sensing data sets of 1985. The finalized vector map of 1995 was overlaid on 1985 images to revise the changed boundaries of 1985.


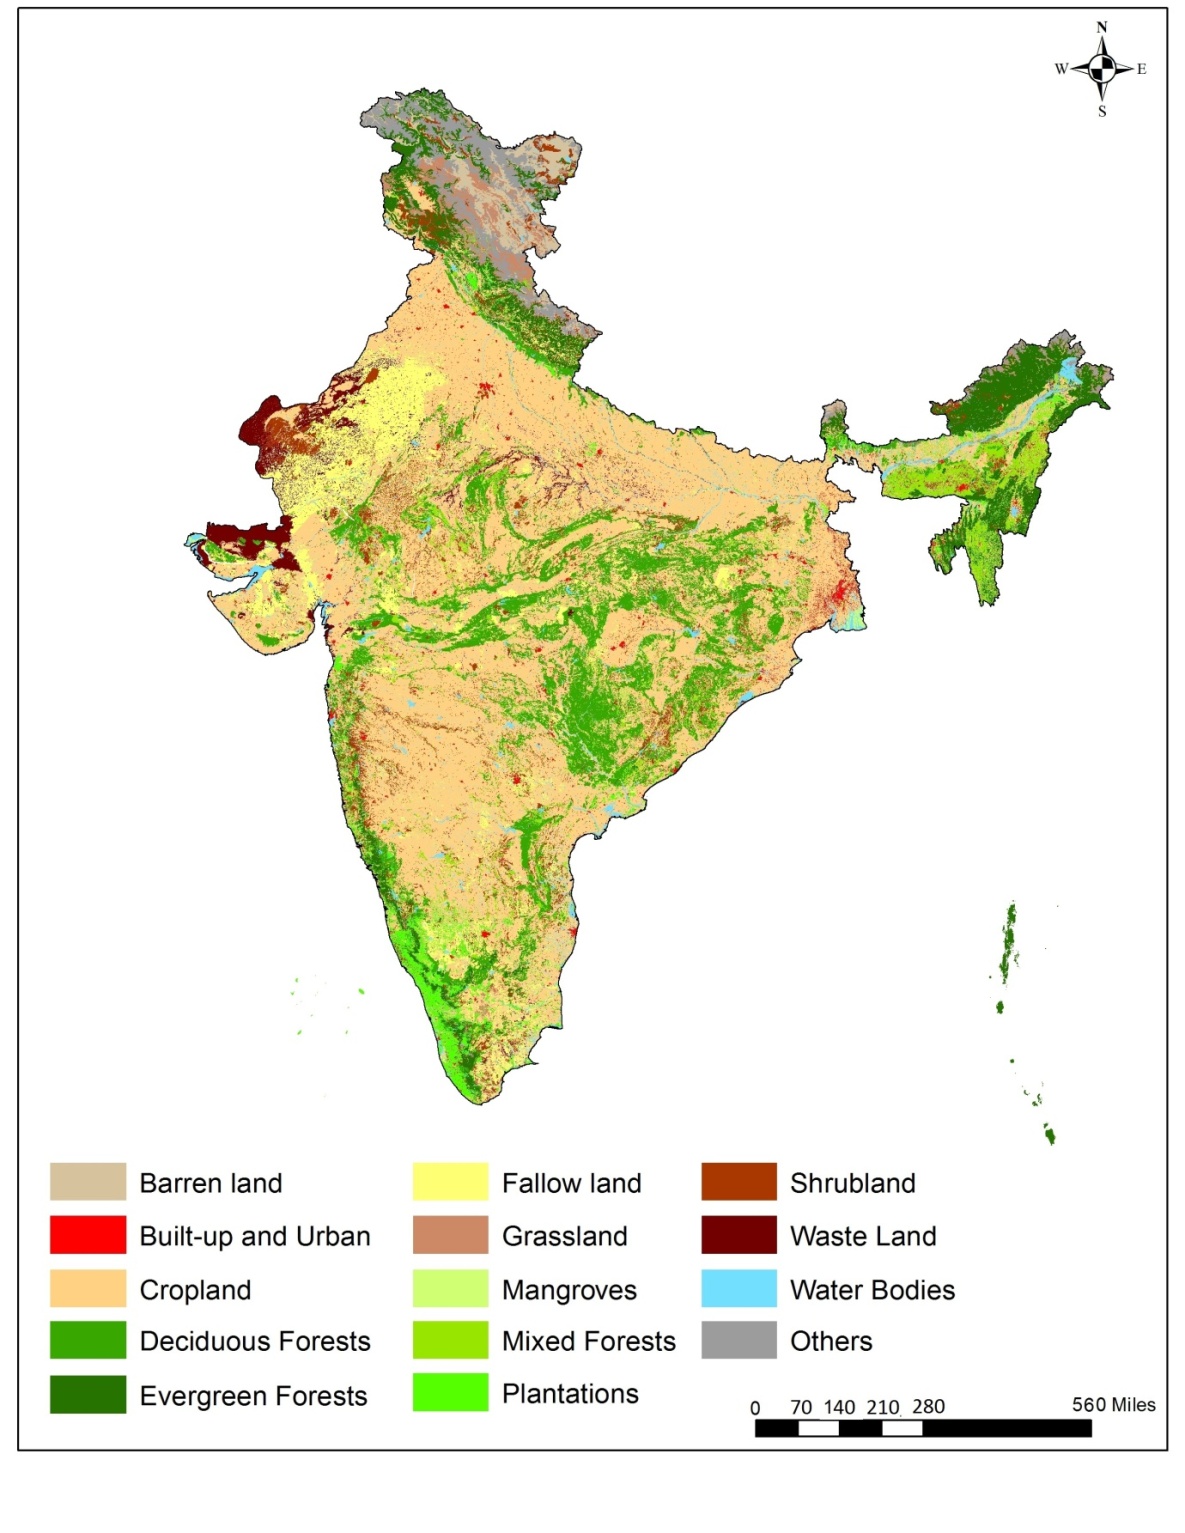


**Figure S5.**Land use and land cover map prepared using satellite remote sensing data sets of 1995. The finalized vector map of 2005 was overlaid on 1995 images to revise the changed boundaries of 1995.

© 2015 by the authors; licensee MDPI, Basel, Switzerland. This article is an open access article distributed under the terms and conditions of the Creative Commons Attribution license (http://creativecommons.org/licenses/by/4.0/).
